# Supplementary material
Source: PubMed Central journal article supplement (PMC2712030)
Supplement: mmc1.pdf [file mmc1.pdf]

Biophysical Journal, Volume 96

**Supporting Material**

**Biophysically-Based Mathematical Modelling of Interstitial Cells of Cajal Slow Wave Activity Generated From a Discrete Unitary Potential Basis**

RA Faville, AJ Pullan, KM Sanders, SD Koh, CM Lloyd, and NP Smith

**SLOW WAVE MODEL  
SUPPLEMENTARY MATERIALS**

## TABLE OF CONTENTS

|                                                            |    |
|------------------------------------------------------------|----|
| Model State Variables                                      | 2  |
| Model Conductances                                         | 3  |
| Pacemaker Unit Model Equations                             | 4  |
| Bulk Cytoplasmic Subspace Model Equations                  | 7  |
| Pacemaker Unit Model Parameters                            | 9  |
| Whole Cell Current Equation Parameters                     | 10 |
| Cell Constants and Global Parameters                       | 11 |
| Subspace 2/Bulk Cytoplasm $\text{Ca}^{2+}$ Diffusion Rates | 12 |
| Dose-Response Simulations                                  | 13 |
| Pacemaker Unit Firing Distribution                         | 20 |
| References                                                 | 22 |

## **MODEL STATE VARIABLES**

### **Pacemaker Unit State Variables**

$C_{S1}$  – Subspace 1 [ $\text{Ca}^{2+}$ ]  
 $C_{S2}$  – Subspace 1 [ $\text{Ca}^{2+}$ ]  
 $C_{ER}$  – Endoplasmic Reticulum [ $\text{Ca}^{2+}$ ]  
 $C_{MT}$  – Mitochondrial [ $\text{Ca}^{2+}$ ]  
 $N_{S1}$  – Subspace 1 [ $\text{Na}^+$ ]  
 $H$  –  $\text{IP}_3\text{R}$  Control Variable  
 $\zeta$  –  $\text{IP}_3\text{R}$  Recovery Variable

### **Whole Cell Current Gating Variables**

$d_T - I_{\text{Ca(T)}}$  Activation Rate  
 $f_T - I_{\text{Ca(T)}}$  Inactivation Rate  
 $O_T - I_{\text{Ca(T)}}$  Open Probability  
 $d_{v1.1} - I_{\text{K(v1.1)}}$  Activation  
 $f_{v1.1} - I_{\text{K(v1.1)}}$  Inactivation  
 $d_{\text{ERG}} - I_{\text{K(ERG)}}$  Activation

### **Global Variables**

$V_m$  – Membrane Potential  
 $C_{\text{Cy}}$  – Bulk Cytoplasmic [ $\text{Ca}^{2+}$ ]

## **MODEL CONDUCTANCES**

### **Pacemaker Unit Conductances**

#### *Plasma Membrane Conductances*

$I_{Ca}$  – Inward  $Ca^{2+}$  Current

$I_{Na}$  – Inward  $Na^+$  Current

$I_{NSCC}$  – Non-Selective Cation Conductance

$I_{PM}$  – Plasma Membrane  $Ca^{2+}$ -ATPase

$I_{NaP}$  – Outward  $Na^+$  Pump

#### *Intracellular $Ca^{2+}$ Fluxes*

$J_{SERCA}$  – Sarco-Endoplasmic Reticulum  $Ca^{2+}$ -ATPase

$J_{IPR}$  –  $IP_3$  Receptor  $Ca^{2+}$  Flux

$J_{MCU}$  – Mitochondrial  $Ca^{2+}$  Uniporter

$J_{NCX}$  – Mitochondrial  $Na^+/Ca^{2+}$  Exchanger

$J_{S1S2}$  – Subspace 1/Subspace 2  $Ca^{2+}$  Diffusion

$J_{S2Cy}$  – Subspace 2/Bulk Cytoplasmic  $Ca^{2+}$  Diffusion

### **Bulk Cytoplasmic Subspace Conductances**

#### *Plasma Membrane Conductances*

$I_{Ca(T)}$  – T-Type  $Ca^{2+}$  Current

$I_{Ca(Ext)}$  –  $Ca^{2+}$  Extrusion Pump

$I_{K(v1.1)}$  –  $K(v1.1)$   $K^+$  Current

$I_{K(ERG)}$  – Ether-a-go-go  $K^+$  Current

$I_{KB}$  – Background  $K^+$  Current

$I_L$  – Non-Selective Inward Current

#### *Intracellular $Ca^{2+}$ Fluxes*

$J_{Cy}$  – Bulk Cytoplasmic Intracellular  $Ca^{2+}$  Flux

## PACEMAKER UNIT MODEL EQUATIONS

### Plasma Membrane Conductances

#### $Ca^{2+}$ Currents

$$I_{Ca} = g_{Ca}(V_m - E_{Ca}) \quad (S1)$$

$$g_{Ca} = \hat{g}_{Ca} e^{k_{Ca} V_m} \quad (S2)$$

$$I_{PM} = g_{PM} \left( \frac{C_{S1}^2}{K_{PM}^2 + C_{S1}^2} \right) \quad (S3)$$

#### $Na^+$ Currents

$$I_{Na} = g_{Na}(V_m - E_{Na}) \quad (S4)$$

$$I_{NaP} = g_{NaP} \left( \frac{N_{S1}^{h_{NaP}}}{K_{NaP}^{h_{NaP}} + N_{S1}^{h_{NaP}}} \right) (E_{NaP} - V_m) \quad (S5)$$

#### Non-Selective Cation Current

$$I_{NSCC(Z)} = g_{NSCC(Z)}(V_m - E_{NSCC}) \quad (S6)$$

$$g_{NSCC(Z)} = \hat{g}_{NSCC(Z)} \left( \frac{K_{NSCC}^{h_{NSCC}}}{K_{NSCC}^{h_{NSCC}} + C_{S1}^{h_{NSCC}}} \right) \quad (S7)$$

where  $Z = Ca$  or  $Na$

#### Nernst Potentials

$$E_{Ca} = \frac{RT}{Z_{Ca}F} \log_e \left( \frac{C_O}{C_{S1}} \right) \quad (S8)$$

$$E_{Na} = \frac{RT}{Z_{Na}F} \log_e \left( \frac{N_O}{N_{S1}} \right) \quad (S9)$$

#### Conductance Rate Scale Factor

$$V_{Scale} = \frac{n_{PU(Base)}}{n_{PU}} \quad (S10)$$

#### Aggregate Plasma Membrane Conductances

$$I_{iCa} = V_{Scale} (I_{Ca} + I_{PM} + I_{NSCC(Ca)}) \quad (S11)$$

$$I_{iNa} = V_{Scale} (I_{Na} + I_{NaP} + I_{NSCC(Na)}) \quad (S12)$$

$$I_{ion_{PU}(i)} = I_{iCa} + I_{iNa} \quad (S13)$$

### Intracellular $Ca^{2+}$ Fluxes

#### ER $Ca^{2+}$ Fluxes

$$J_{SERCA} = \frac{V_{SERCA} (C_{S1} - A_2 C_{ER})}{1 + A_4 C_{S1} + A_5 C_{ER} + A_6 C_{S1} C_{ER}} \quad (S14)$$

$$J_{IPR} = k_{IPR} \left( \frac{P\phi_1 H}{P\phi_1 + \phi_{-1}} \right)^4 (C_{ER} - C_{S2}) \quad (S15)$$

#### Mitochondrial $Ca^{2+}$ Fluxes

$$J_{MCU} = V_{MCU} \left( \frac{C_{S2}^2}{K_{MCU}^2 + C_{S2}^2} \right) \varepsilon_{INH} \quad (S16)$$

$$\varepsilon_{INH} = \frac{K_{INH}^{h_{INH}}}{K_{INH}^{h_{INH}} + C_{MT}^{h_{INH}}} \quad (S17)$$

$$J_{NCX} = V_{NCX} \left( \frac{C_{MT}}{K_{NCX} + C_{MT}} \right) \quad (S18)$$

#### Inter-Compartmental Volume $Ca^{2+}$ Diffusion

$$J_{S1S2(i)} = \mu_{S1S2(i)} (C_{S2(i)} - C_{S1(i)}) \quad (S19)$$

$$\mu_{S1S2(i)} = \mu_A + (\mu_B - \mu_A) \left[ \frac{i-1}{n_{PU} - 1} \right] \quad (S20)$$

$$J_{S2Cy(i)} = \mu_{S2Cy(i)} (C_{Cy} - C_{S2(i)}) \quad (S21)$$

**NB** –  $\mu_{S2Cy}$  values (for  $n_{PU} = 5-10, 15, 20$  &  $25$ ) are given in Table S5

### IP<sub>3</sub>R Rate Equations

$$\phi_1 = \frac{k_1 R_1 + r_2 C_{S2}}{R_1 + C_{S2}} \quad (S22)$$

$$\phi_{-1} = \frac{(k_{-1} + r_{-2}) R_3}{R_3 + C_{S2}} \quad (S23)$$

$$\phi_2 = \frac{k_2 R_3 + r_4 C_{S2}}{R_3 + C_{S2}} \quad (S24)$$

$$\phi_3 = \frac{g_{\phi_3} \zeta}{\left[ 1 + \left( \frac{K_{\phi_3(\text{act})}}{C_{S2}} \right)^{h_{\phi_3(\text{act})}} \right] \left[ 1 + \left( \frac{C_{S2}}{K_{\phi_3(\text{inh})}} \right)^{h_{\phi_3(\text{inh})}} \right]} \quad (\text{S25})$$

### IP<sub>3</sub>R Recovery Variable Equations

$$\frac{d\zeta}{dt} = \alpha_{\zeta}(1 - \zeta) - \beta_{\zeta}\zeta \quad (\text{S26})$$

$$\alpha_{\zeta} = g_{\alpha} \quad (\text{S27})$$

$$\beta_{\zeta} = g_{\beta} \frac{C_{S2}^{h_{\beta}}}{C_{S2}^{h_{\beta}} + K_{\beta}^{h_{\beta}}} \quad (\text{S28})$$

### Mitochondrial Ca<sup>2+</sup> Buffering Rate

$$f_m = \frac{1}{1 + \frac{K_m B_m}{(K_m + C_{MT})^2}} \quad (\text{S29})$$

### Compartmental Volume Ratio

$$\lambda_{X/Y} = \frac{\gamma_X}{\gamma_Y} \quad (\text{S30})$$

where X, Y = S<sub>1</sub>, S<sub>2</sub>, ER or MT

### State Variable Derivatives

$$\frac{dC_{S1}}{dt} = J_{S1S2} + \lambda_{MT/S1} J_{NCX} - \left( \frac{\delta_{S(\text{PU})}}{V_{\text{Scale}} Z_{\text{Ca}}} \right) I_{\text{Ca}} - \lambda_{ER/S1} J_{\text{SERCA}} \quad (\text{S31})$$

$$\frac{dC_{S2}}{dt} = J_{S2Cy} + \lambda_{ER/S2} J_{\text{IPR}} - \lambda_{S1/S2} J_{S1S2} - \lambda_{MT/S2} J_{\text{MCU}} \quad (\text{S32})$$

$$\frac{dC_{\text{ER}}}{dt} = J_{\text{SERCA}} - J_{\text{IPR}} \quad (\text{S33})$$

$$\frac{dC_{\text{MT}}}{dt} = f_m (J_{\text{MCU}} - J_{\text{NCX}}) \quad (\text{S34})$$

$$\frac{dN_{S1}}{dt} = - \left( \frac{\delta_{S(\text{PU})}}{V_{\text{Scale}} Z_{\text{Na}}} \right) I_{\text{Na}} \quad (\text{S35})$$

$$\frac{dH}{dt} = \phi_3(1 - H) - \left( \frac{P\phi_1\phi_2}{P\phi_1 + \phi_{-1}} \right) H \quad (\text{S36})$$



## BULK CYTOPLASMIC SUBSPACE MODEL EQUATIONS

### Plasma Membrane Conductances

#### $Ca^{2+}$ Currents

$$I_{Ca(T)} = g_{Ca(T)} O_T (V_m - E_{Ca(T)}) \quad (S37)$$

$$I_{Ca(Ext)} = g_{Ca(Ext)} \left( \frac{C_{Cy}}{K_{Ca(Ext)} + C_{Cy}} \right) \quad (S38)$$

#### $K^+$ Currents

$$I_{K(v1.1)} = g_{K(v1.1)} d_{v1.1} f_{v1.1} (V_m - E_K) \quad (S39)$$

$$I_{K(ERG)} = g_{K(ERG)} d_{ERG} (V_m - E_K) \quad (S40)$$

$$I_{K(B)} = g_{K(B)} (V_m - E_{K(B)}) \quad (S41)$$

#### Other Currents

$$I_L = g_L (V_m - E_L) \quad (S42)$$

#### Nernst Potentials

$$E_K = \frac{RT}{Z_K F} \log_e \left( \frac{K_O}{K_i} \right) \quad (S43)$$

#### Aggregate Currents

$$I_{ion_{cy}} = I_{Ca(T)} + I_{Ca(Ext)} + I_{K(v1.1)} + I_{K(ERG)} + I_{K(B)} + I_L \quad (S44)$$

### Intracellular $Ca^{2+}$ Fluxes

$$J_{Cy} = \mu_{Cy} (C_\infty - C_{Cy}) \quad (S45)$$

### Ionic Current Gating Differential Equations

#### $I_{Ca(T)}$ Current

$$\frac{dO_T}{dt} = \alpha_{OT} d_T f_T - \beta_{OT} O_T \quad (S46)$$

$$\frac{dX_T}{dt} = \frac{X_{T\infty} - X_T}{\tau_{XT}} \quad (\text{S47})$$

for  $X = d$  or  $f$

$$X_{T\infty} = \frac{1}{1 + e^{k_{XT}(V_m - V_{XT})}} \quad (\text{S48})$$

$$\tau_{dT} = A_{dT(1)} \quad (\text{S49})$$

$$\tau_{fT} = A_{fT(1)} + \frac{(A_{fT(2)} - A_{fT(1)})}{1 + e^{A_{fT(3)}(V_m - A_{fT(4)})}} \quad (\text{S50})$$

### $K^+$ Currents

$$\frac{dX}{dt} = \alpha_X(1 - X) - \beta_X X \quad (\text{S51})$$

for  $X = d_{v1.1}, f_{v1.1}, d_{\text{ERG}}$

$$\alpha_X = A_{X(1)} \left[ \frac{A_{X(2)}}{1 + e^{A_{X(3)}(V_m - A_{X(4)})}} + (1 - A_{X(2)}) \right] \quad (\text{S52})$$

$$\beta_X = A_{X(1)} \left[ A_{X(2)} - \frac{A_{X(2)}}{1 + e^{A_{X(3)}(V_m - A_{X(4)})}} \right] \quad (\text{S53})$$

### Global State Variable Derivatives

$$\frac{dV_m}{dt} = -\frac{1}{C_m} \left[ I_{\text{ion}_{\text{Cy}}} + \sum_{i=1}^{n_{\text{PU}}} I_{\text{ion}_{\text{PU}}(i)} \right] \quad (\text{S54})$$

$$\frac{dC_{\text{Cy}}}{dt} = J_{\text{Cy}} - \lambda_{\text{S2Cy}} \sum_{i=1}^{n_{\text{PU}}} J_{\text{S2Cy}(i)} - \left( \frac{\delta_{\text{S(Cy)}}}{Z_{\text{Ca}}} \right) [I_{\text{Ca(T)}} + I_{\text{Ca(Ext)}}] \quad (\text{S55})$$

**PACEMAKER UNIT MODEL PARAMETERS**

| <b>Plasma Membrane Conductances</b>                       |                                         |     |                    |                      |                                          |         |                    |  |
|-----------------------------------------------------------|-----------------------------------------|-----|--------------------|----------------------|------------------------------------------|---------|--------------------|--|
| <i>Ca<sup>2+</sup> Currents</i>                           |                                         |     |                    |                      |                                          |         |                    |  |
| $\hat{g}_{Ca}$                                            | 0.074 pS                                | S2  | F <sub>UP</sub> *  | $k_{Ca}$             | 0.013 mV <sup>-1</sup>                   | S2      | F <sub>UP</sub> ** |  |
| $g_{PM}$                                                  | 675 fA                                  | S3  | F <sub>UP</sub> *  | $K_{PM}$             | 1 μM                                     | S3      | (1)                |  |
| <i>Na<sup>+</sup> Currents</i>                            |                                         |     |                    |                      |                                          |         |                    |  |
| $g_{Na}$                                                  | 13.5 pS                                 | S4  | F <sub>UP</sub> ** | $g_{NaP}$            | 187.5 pS                                 | S5      | F <sub>UP</sub> *  |  |
| $E_{NaP}$                                                 | 10 mV                                   | S5  | (2)**              | $K_{NaP}$            | 1 x 10 <sup>4</sup> μM                   | S5      | F <sub>UP</sub>    |  |
| $h_{NaP}$                                                 | 4                                       | S5  | F <sub>UP</sub>    |                      |                                          |         |                    |  |
| <i>Non-Selective Cation Conductance</i>                   |                                         |     |                    |                      |                                          |         |                    |  |
| $E_{NSCC}$                                                | 0 mV                                    | S6  | (3)                | $\hat{g}_{NSCC(Ca)}$ | 0.1 pS                                   | S7      | F <sub>UP</sub> *  |  |
| $\hat{g}_{NSCC(Na)}$                                      | 160 pS                                  | S7  | F <sub>UP</sub> *  | $K_{NSCC}$           | 0.12 μM                                  | S7      | F <sub>UP</sub>    |  |
| $h_{NSCC}$                                                | 4                                       | S7  | (3)                |                      |                                          |         |                    |  |
| <b>Intracellular Ca<sup>2+</sup> Fluxes</b>               |                                         |     |                    |                      |                                          |         |                    |  |
| <i>Endoplasmic Reticulum Ca<sup>2+</sup> Conductances</i> |                                         |     |                    |                      |                                          |         |                    |  |
| $k_{IPR}$                                                 | 2000 s <sup>-1</sup>                    | S15 | F <sub>UP</sub>    | $V_{SERCA}$          | 1 x 10 <sup>5</sup> s <sup>-1</sup>      | S14     | F <sub>UP</sub>    |  |
| $A_2$                                                     | 6 x 10 <sup>-4</sup>                    | S14 | F <sub>UP</sub>    | $A_4$                | 3.57 μM <sup>-1</sup>                    | S14     | (4)                |  |
| $A_5$                                                     | 2.7 x 10 <sup>-5</sup> μM <sup>-1</sup> | S14 | (4)                | $A_6$                | 2.31 x 10 <sup>-5</sup> μM <sup>-2</sup> | S14     | (4)                |  |
| <i>Mitochondrial Ca<sup>2+</sup> Conductances</i>         |                                         |     |                    |                      |                                          |         |                    |  |
| $V_{MCU}$                                                 | 800 μM s <sup>-1</sup>                  | S16 | F <sub>UP</sub>    | $K_{MCU}$            | 10 μM                                    | S16     | (5)                |  |
| $K_{INH}$                                                 | 10 μM                                   | S17 | F <sub>UP</sub>    | $h_{INH}$            | 4                                        | S17     | F <sub>UP</sub>    |  |
| $V_{NCX}$                                                 | 3 μM s <sup>-1</sup>                    | S18 | F <sub>UP</sub> *  | $K_{NCX}$            | 0.30 μM                                  | S18     | (6)                |  |
| $K_m$                                                     | 0.01 μM                                 | S29 | F <sub>UP</sub>    | $B_m$                | 1000 μM                                  | S29     | F <sub>UP</sub>    |  |
| <i>Intracellular Ca<sup>2+</sup> Diffusion Rates</i>      |                                         |     |                    |                      |                                          |         |                    |  |
| $\mu_A$                                                   | 0.30 s <sup>-1</sup>                    | S20 | F <sub>UP</sub>    | $\mu_B$              | 0.24 s <sup>-1</sup>                     | S20     | F <sub>UP</sub>    |  |
| <b>IP<sub>3</sub>R Rate Parameters</b>                    |                                         |     |                    |                      |                                          |         |                    |  |
| <i>Instantaneous Rate Equations</i>                       |                                         |     |                    |                      |                                          |         |                    |  |
| $k_1$                                                     | 0 s <sup>-1</sup>                       | S22 | F <sub>UP</sub>    | $k_{-1}$             | 6.4 s <sup>-1</sup>                      | S23     | F <sub>UP</sub>    |  |
| $k_2$                                                     | 4 s <sup>-1</sup>                       | S24 | F <sub>UP</sub>    | $r_2$                | 250 s <sup>-1</sup>                      | S22     | F <sub>UP</sub>    |  |
| $r_{-2}$                                                  | 0 μM s <sup>-1</sup>                    | S23 | F <sub>UP</sub>    | $r_4$                | 750 s <sup>-1</sup>                      | S24     | F <sub>UP</sub>    |  |
| $R_1$                                                     | 36 μM                                   | S22 | (7)                | $R_3$                | 300 μM                                   | S23,S24 | (7)                |  |
| <i>φ<sub>3</sub> Rate Parameters</i>                      |                                         |     |                    |                      |                                          |         |                    |  |
| $g_{\phi_3}$                                              | 4.5 s <sup>-1</sup>                     | S25 | F <sub>UP</sub>    | $K_{\phi_3(act)}$    | 0.1 μM                                   | S25     | F <sub>UP</sub>    |  |
| $K_{\phi_3(inh)}$                                         | 0.5 μM                                  | S25 | F <sub>UP</sub>    | $h_{\phi_3(act)}$    | 3                                        | S25     | F <sub>UP</sub>    |  |
| $h_{\phi_3(inh)}$                                         | 3                                       | S25 | F <sub>UP</sub>    |                      |                                          |         |                    |  |
| <i>ζ Rate Parameters</i>                                  |                                         |     |                    |                      |                                          |         |                    |  |
| $g_\alpha$                                                | 0.85 s <sup>-1</sup>                    | S27 | F <sub>UP</sub>    | $g_\beta$            | 1.5 x 10 <sup>3</sup> s <sup>-1</sup>    | S28     | F <sub>UP</sub>    |  |
| $K_\beta$                                                 | 0.35 μM                                 | S28 | F <sub>UP</sub>    | $h_\beta$            | 4                                        | S28     | F <sub>UP</sub>    |  |

**Table S1 – Pacemaker Unit Model Equation Parameters**

Numbers in parenthesis denotes literary reference. F<sub>UP</sub> denotes that parameter was fitted to reproduce unitary potential characteristics (see “Parameter Estimation” from Ref. (8)).

\* denotes parameter was modified from original model.

\*\* denotes parameter was added to model framework.

## WHOLE CELL CURRENT EQUATION PARAMETERS

| Plasma Membrane Conductances           |               |                        |         |                 |               |                    |         |                 |
|----------------------------------------|---------------|------------------------|---------|-----------------|---------------|--------------------|---------|-----------------|
| <i>Ca<sup>2+</sup> Currents</i>        |               |                        |         |                 |               |                    |         |                 |
|                                        | $g_{Ca(T)}$   | 800 pS                 | S37     | F <sub>SW</sub> | $E_{Ca(T)}$   | 17 mV              | S37     | (8)             |
|                                        | $g_{Ca(Ext)}$ | 100 fA                 | S38     | F <sub>SW</sub> | $K_{Ca(Ext)}$ | 1.0 μM             | S38     | F <sub>SW</sub> |
| <i>K<sup>+</sup> Currents</i>          |               |                        |         |                 |               |                    |         |                 |
|                                        | $g_{K(v1.1)}$ | 10 pS                  | S39     | F <sub>SW</sub> | $g_{K(ERG)}$  | 6 pS               | S40     | F <sub>SW</sub> |
|                                        | $g_{K(B)}$    | 13.5 pS                | S41     | F <sub>SW</sub> | $E_{K(B)}$    | -70 mV             | S41     | F <sub>SW</sub> |
| <i>Other Currents</i>                  |               |                        |         |                 |               |                    |         |                 |
|                                        | $g_L$         | 0.8 pS                 | S42     | F <sub>SW</sub> | $E_L$         | 0 mV               | S42     | (3)             |
| Intracellular Ca <sup>2+</sup> Fluxes  |               |                        |         |                 |               |                    |         |                 |
|                                        | $\mu_{Cy}$    | 1.3 s <sup>-1</sup>    | S45     | F <sub>SW</sub> | $C_\infty$    | 0.12 μM            | S45     | F <sub>SW</sub> |
| Gating Variable Rate Equations         |               |                        |         |                 |               |                    |         |                 |
| <i>O<sub>T</sub> Rate Equations</i>    |               |                        |         |                 |               |                    |         |                 |
|                                        | $\alpha_{OT}$ | 240 s <sup>-1</sup>    | S46     | F <sub>SW</sub> | $\beta_{OT}$  | 72 s <sup>-1</sup> | S46     | F <sub>SW</sub> |
| <i>d<sub>T</sub> Rate Equations</i>    |               |                        |         |                 |               |                    |         |                 |
|                                        | $k_{dT}$      | -0.60 mV <sup>-1</sup> | S48     | (9)             | $V_{dT}$      | -53 mV             | S48     | (9)             |
|                                        | $A_{dT(1)}$   | 0.0025 s               | S49     | (9)             |               |                    |         |                 |
| <i>f<sub>T</sub> Rate Equations</i>    |               |                        |         |                 |               |                    |         |                 |
|                                        | $k_{fT}$      | 1 mV <sup>-1</sup>     | S48     | (9)             | $V_{fT}$      | -65 mV             | S48     | (9)             |
|                                        | $A_{fT(1)}$   | 0.019 s                | S50     | (9)             | $A_{fT(2)}$   | 6.75 s             | S50     | (9)             |
|                                        | $A_{fT(3)}$   | 2 mV <sup>-1</sup>     | S50     | (9)             | $A_{fT(4)}$   | -40 mV             | S50     | (9)             |
| <i>d<sub>v1.1</sub> Rate Equations</i> |               |                        |         |                 |               |                    |         |                 |
|                                        | $A_{dv(1)}$   | 1000 s <sup>-1</sup>   | S52,S53 | (10)            | $A_{dv(2)}$   | 0.80               | S52,S53 | (10)            |
|                                        | $A_{dv(3)}$   | -0.13 mV <sup>-1</sup> | S52,S53 | (10)            | $A_{dv(4)}$   | 25 mV              | S52,S53 | (10)            |
| <i>f<sub>v1.1</sub> Rate Equations</i> |               |                        |         |                 |               |                    |         |                 |
|                                        | $A_{fv(1)}$   | 333 s <sup>-1</sup>    | S52,S53 | (10)            | $A_{fv(2)}$   | 0.10               | S52,S53 | (10)            |
|                                        | $A_{fv(3)}$   | 0.23 mV <sup>-1</sup>  | S52,S53 | (10)            | $A_{fv(4)}$   | 44.8 mV            | S52,S53 | (10)            |
| <i>d<sub>ERG</sub> Rate Equations</i>  |               |                        |         |                 |               |                    |         |                 |
|                                        | $A_{dERG(1)}$ | 1000 s <sup>-1</sup>   | S52,S53 | (10)            | $A_{dERG(2)}$ | 0.70               | S52,S53 | (10)            |
|                                        | $A_{dERG(3)}$ | -0.56 mV <sup>-1</sup> | S52,S53 | (10)            | $A_{dERG(4)}$ | 30 mV              | S52,S53 | (10)            |

**Table S2 – Whole Cell Current Model Equation Parameters**

Numbers in parenthesis denotes literary reference. FSW denotes that parameter was fitted to reproduce slow wave characteristics (see “Parameter Estimation” section in manuscript).

**CELL CONSTANTS AND GLOBAL PARAMETERS**

| <b>Universal Constants</b>           |                                                        |            |                  |                                        |           |
|--------------------------------------|--------------------------------------------------------|------------|------------------|----------------------------------------|-----------|
| $R$                                  | $8.31 \times 10^3 \text{ aJ zmol}^{-1} \text{ K}^{-1}$ | S8,S9,S43  | $T$              | 310.16 K                               | S8,S9,S43 |
| $F$                                  | $9.649 \times 10^{-2} \text{ fC zmol}^{-1}$            | S8,S9,S43  |                  |                                        |           |
| <b>Ion/Metabolite Concentrations</b> |                                                        |            |                  |                                        |           |
| $C_O$                                | $1.8 \times 10^3 \text{ } \mu\text{M}$                 | S8         | $N_O$            | $140 \times 10^3 \text{ } \mu\text{M}$ | S9        |
| $K_O$                                | $5.4 \times 10^3 \text{ } \mu\text{M}$                 | S43        | $K_i$            | $145 \times 10^3 \text{ } \mu\text{M}$ | S43       |
| $P$                                  | $1 \text{ } \mu\text{M}$                               | S15,S36    |                  |                                        |           |
| <b>Ion Valency</b>                   |                                                        |            |                  |                                        |           |
| $Z_{Ca}$                             | 2                                                      | S8,S31,S55 | $Z_{Na}$         | 1                                      | S9,S35    |
| $Z_K$                                | 1                                                      | S43        |                  |                                        |           |
| <b>Compartmental Volume Ratios</b>   |                                                        |            |                  |                                        |           |
| $\gamma_{S1}$                        | 100                                                    | S30        | $\gamma_{S2}$    | 1                                      | S30       |
| $\gamma_{ER}$                        | 20                                                     | S30        | $\gamma_{MT}$    | 200                                    | S30       |
| $\gamma_{Cy}$                        | 1000                                                   | S30        |                  |                                        |           |
| <b>Cell Constants</b>                |                                                        |            |                  |                                        |           |
| $\delta_{S(Cy)}$                     | $2 \times 10^{-3} \text{ } \mu\text{M C}^{-1}$         | S55        | $\delta_{S(PU)}$ | $9.25 \text{ } \mu\text{M C}^{-1}$     | S31,S35   |
| $C_m$                                | 20 pF                                                  | S54        | $n_{PU(Base)}$   | 50                                     | S10       |

**Table S3 – Model Cell Constants and Other Global Parameters**

**INITIAL STATE VARIABLE VALUES**

| <b>Pacemaker Unit State Variables</b>      |                                         |            |                     |
|--------------------------------------------|-----------------------------------------|------------|---------------------|
| $C_{S1}$                                   | 0.120 $\mu\text{M}$                     | $C_{S2}$   | 0.023 $\mu\text{M}$ |
| $C_{ER}$                                   | 200 $\mu\text{M}$                       | $C_{MT}$   | 0.200 $\mu\text{M}$ |
| $N_{S1}$                                   | $1.01 \times 10^4 \text{ } \mu\text{M}$ | $H$        | 0.200               |
| $\zeta$                                    | 0.300                                   |            |                     |
| <b>Whole Cell Current Gating Variables</b> |                                         |            |                     |
| $d_T$                                      | 0.010                                   | $f_T$      | 0.001               |
| $O_T$                                      | 0.000                                   | $d_{v1.1}$ | 0.000               |
| $f_{v1.1}$                                 | 1.000                                   | $d_{ERG}$  | 0.000               |
| <b>Global Variables</b>                    |                                         |            |                     |
| $V_m$                                      | -70 mV                                  | $C_{Cy}$   | 0.12 $\mu\text{M}$  |

**Table S4 – Model State Variable Initial Values**

**SUBSPACE 2/BULK CYTOPLASM  $\text{Ca}^{2+}$  DIFFUSION RATES**

| PU # | $n_{\text{PU}} = 5$ | $n_{\text{PU}} = 6$ | $n_{\text{PU}} = 7$ | $n_{\text{PU}} = 8$ | $n_{\text{PU}} = 9$ | $n_{\text{PU}} = 10$ | $n_{\text{PU}} = 15$ | $n_{\text{PU}} = 20$ | $n_{\text{PU}} = 25$ |
|------|---------------------|---------------------|---------------------|---------------------|---------------------|----------------------|----------------------|----------------------|----------------------|
| 1    | 0.0000              | 0.0000              | 0.0000              | 0.0000              | 0.0000              | 0.0000               | 0.0000               | 0.0000               | 0.0000               |
| 2    | 0.4788              | 0.4133              | 0.4071              | 0.3662              | 0.3520              | 0.3361               | 0.2150               | 0.1544               | 0.1136               |
| 3    | 0.6843              | 0.5577              | 0.4752              | 0.4253              | 0.3850              | 0.3658               | 0.4367               | 0.3260               | 0.2489               |
| 4    | 0.9335              | 0.7464              | 0.6244              | 0.5441              | 0.4829              | 0.4357               | 0.5096               | 0.4981               | 0.3872               |
| 5    | 1.1673              | 0.9389              | 0.7818              | 0.6750              | 0.5935              | 0.5351               | 0.4565               | 0.4844               | 0.5217               |
| 6    |                     | 1.1184              | 0.9388              | 0.8062              | 0.7095              | 0.6366               | 0.5033               | 0.4455               | 0.5672               |
| 7    |                     |                     | 1.0827              | 0.9357              | 0.8240              | 0.7386               | 0.5390               | 0.4628               | 0.4886               |
| 8    |                     |                     |                     | 1.0545              | 0.9325              | 0.8361               | 0.6042               | 0.5127               | 0.4790               |
| 9    |                     |                     |                     |                     | 1.0336              | 0.9320               | 0.6642               | 0.5458               | 0.5179               |
| 10   |                     |                     |                     |                     |                     | 1.0185               | 0.7348               | 0.5831               | 0.5282               |
| 11   |                     |                     |                     |                     |                     |                      | 0.7977               | 0.6366               | 0.5536               |
| 12   |                     |                     |                     |                     |                     |                      | 0.8619               | 0.6802               | 0.5883               |
| 13   |                     |                     |                     |                     |                     |                      | 0.9241               | 0.7256               | 0.6200               |
| 14   |                     |                     |                     |                     |                     |                      | 0.9812               | 0.7694               | 0.6541               |
| 15   |                     |                     |                     |                     |                     |                      | 1.0344               | 0.8221               | 0.6935               |
| 16   |                     |                     |                     |                     |                     |                      |                      | 0.8690               | 0.7305               |
| 17   |                     |                     |                     |                     |                     |                      |                      | 0.9096               | 0.7684               |
| 18   |                     |                     |                     |                     |                     |                      |                      | 0.9550               | 0.8036               |
| 19   |                     |                     |                     |                     |                     |                      |                      | 0.9965               | 0.8343               |
| 20   |                     |                     |                     |                     |                     |                      |                      | 1.0347               | 0.8712               |
| 21   |                     |                     |                     |                     |                     |                      |                      |                      | 0.9092               |
| 22   |                     |                     |                     |                     |                     |                      |                      |                      | 0.9435               |
| 23   |                     |                     |                     |                     |                     |                      |                      |                      | 0.9768               |
| 24   |                     |                     |                     |                     |                     |                      |                      |                      | 1.0079               |
| 25   |                     |                     |                     |                     |                     |                      |                      |                      | 1.0361               |

**Table S5 – Subspace 2/Bulk Cytoplasmic ( $\mu_{\text{S2Cy}}$ )  $\text{Ca}^{2+}$  Diffusion Rates**

## **DOSE-RESPONSE SIMULATIONS**

The following is of the dose-response simulations that have been included in the supplementary materials:

- Figure 1 – Decreased  $[\text{Ca}^{2+}]_o$
- Figure 2 – Decreased  $[\text{Na}^+]_o$
- Figure 3 – Increased  $[\text{K}^+]_o$
- Figure 4 – Varying  $[\text{IP}_3]$
- Figure 5 –  $J_{\text{NCX}}$  Inhibition
- Figure 6 –  $I_{\text{K(ERG)}}$  Inhibition

The format of each dose-response simulation figure is comprised of 9 subplots (*A-I*). The subplots *A-H* are separated into two columns, the first column illustrating the simulated  $V_m$  response and the second the pacemaker unit discharge rastergram. Each row, within this subplot group, is the response generated by the proportional change in the target parameter (see Table 5 of the manuscript) which indicated by the key given in subplot *I*. The final subplot (*I*) shows the change in the slow wave characteristic values from control conditions, a list of which is given below:

- MDP (mV) ,
- Amplitude (mV) ,
- $\{dV_m/dt\}_{\text{max}}$  (mV s<sup>-1</sup>) , and
- Frequency (cpm)

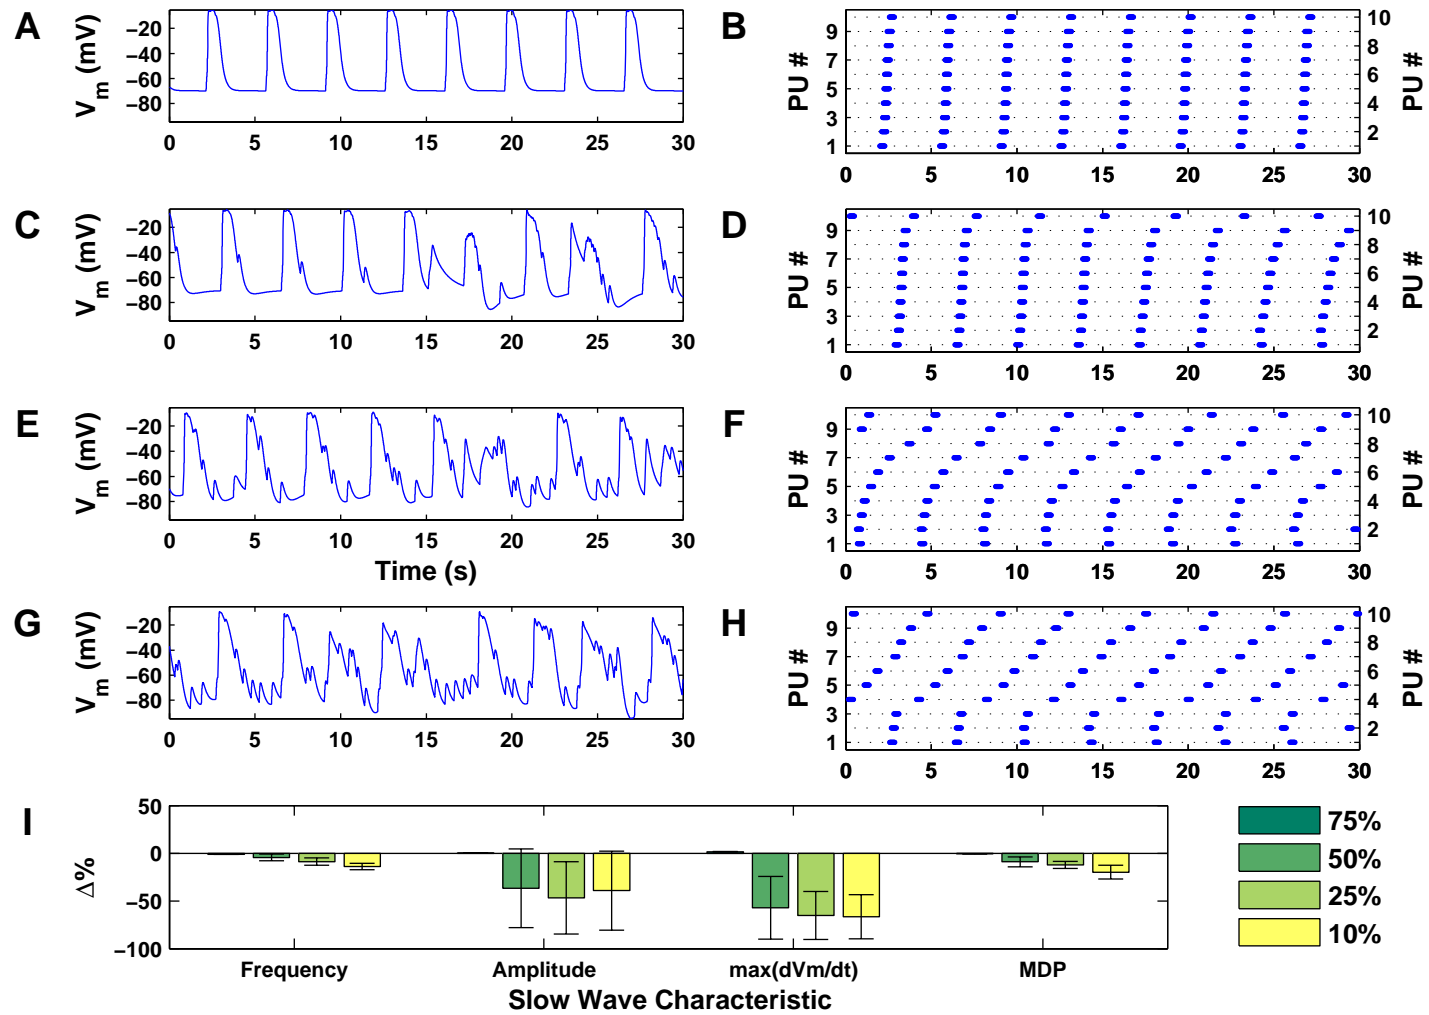

Figure S1 – Decreased Extracellular  $[Ca^{2+}]$  Dose Response Simulation



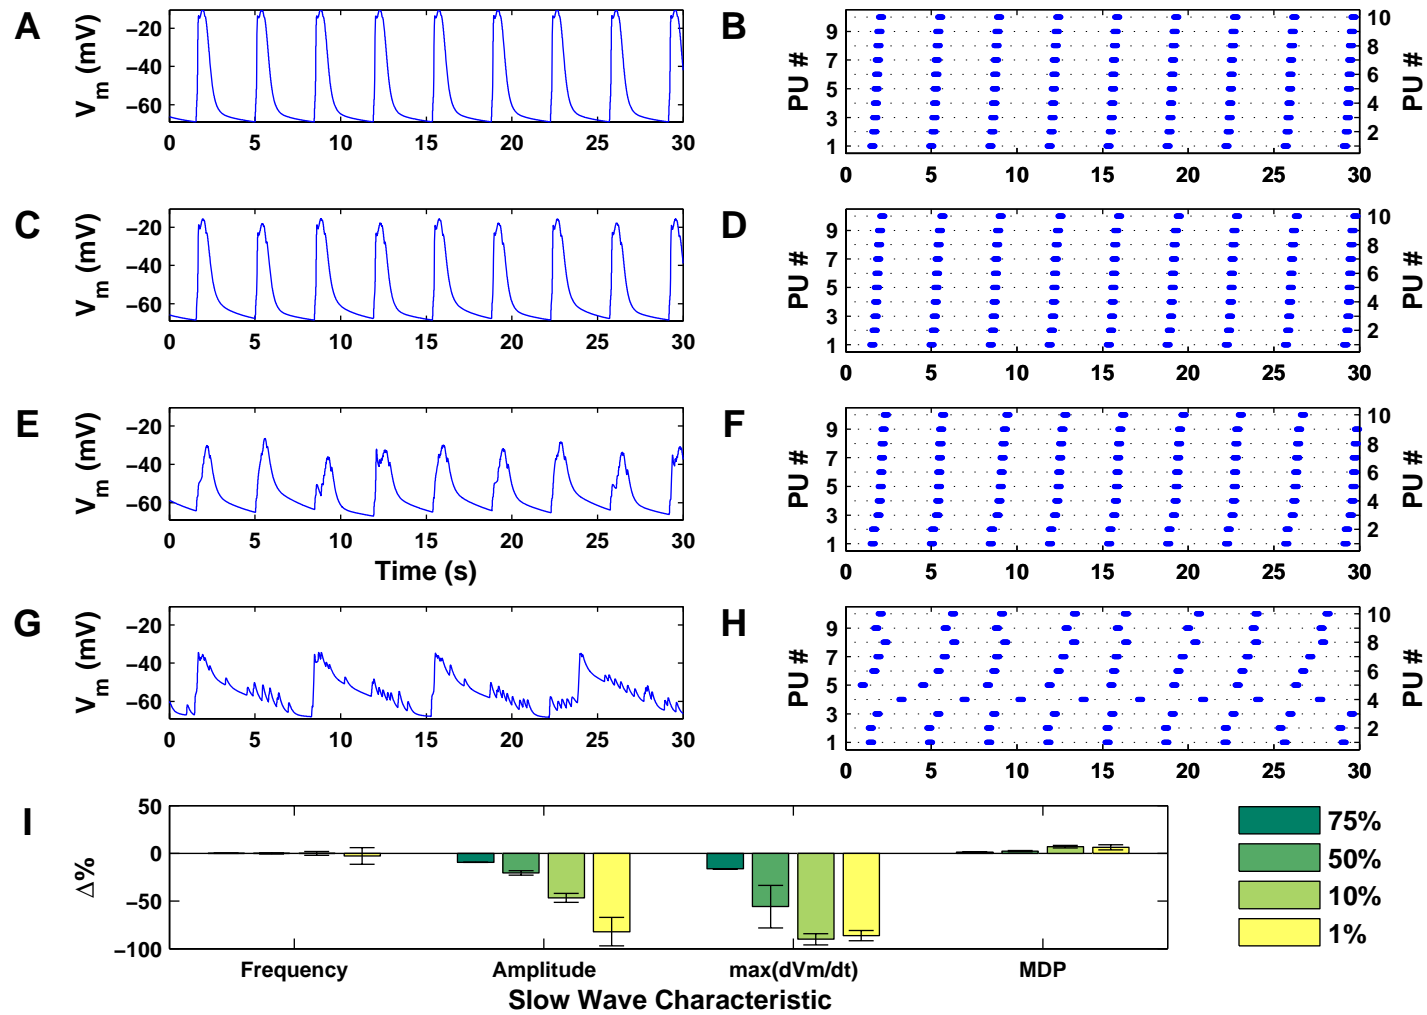

Figure S2 – Decreased Extracellular  $[Na^+]$  Dose Response Simulations

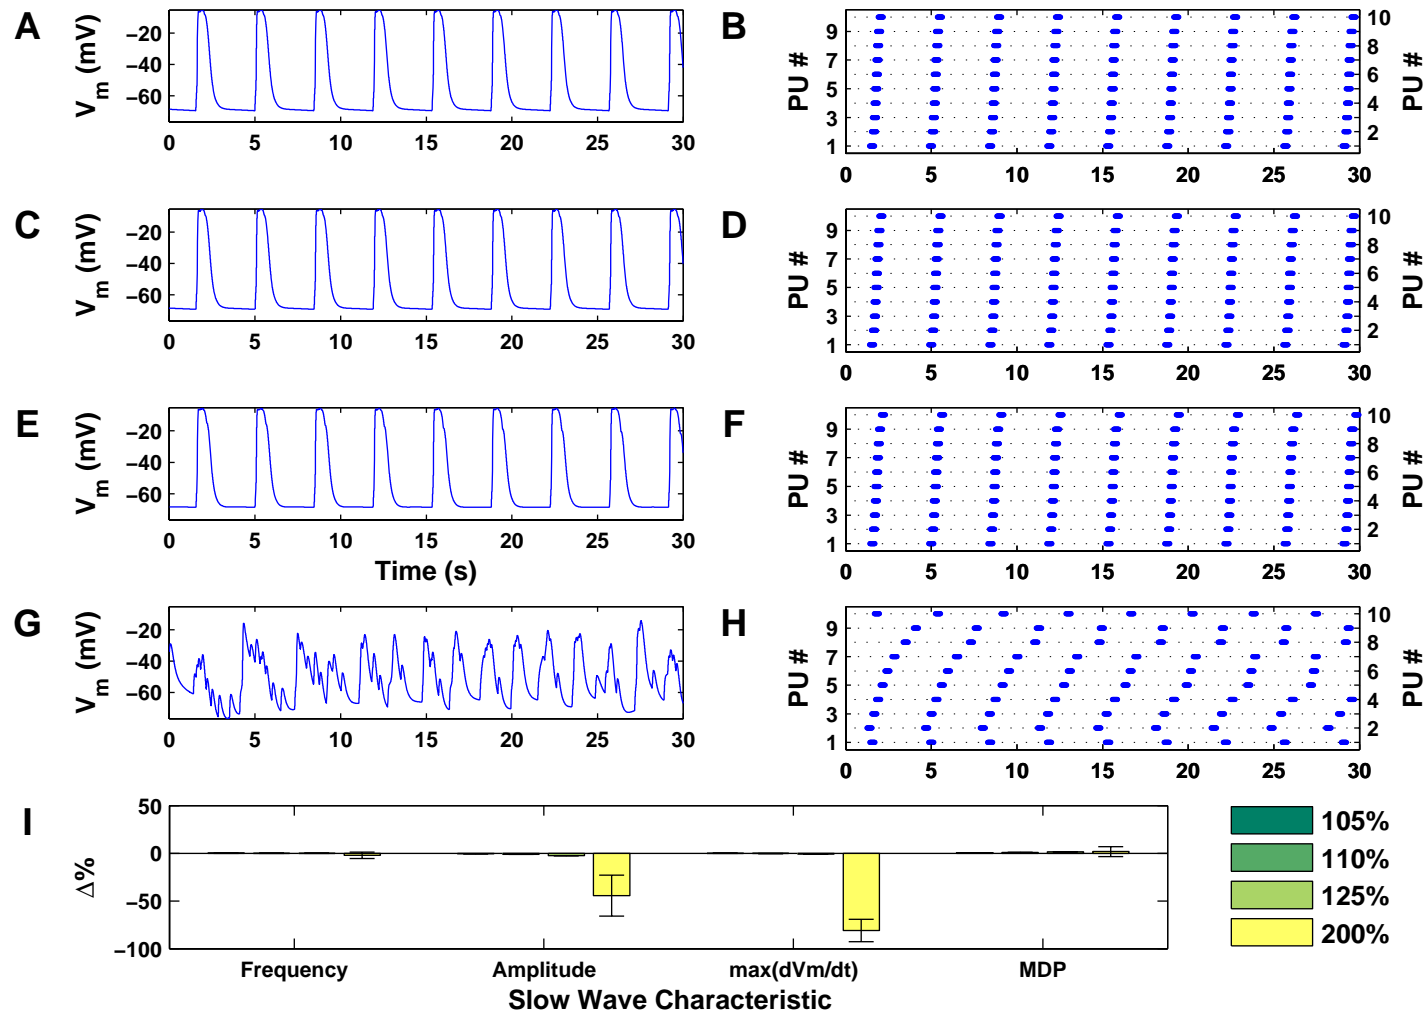

Figure S3 – Increase Extracellular  $[K^+]$  Dose Response Simulations

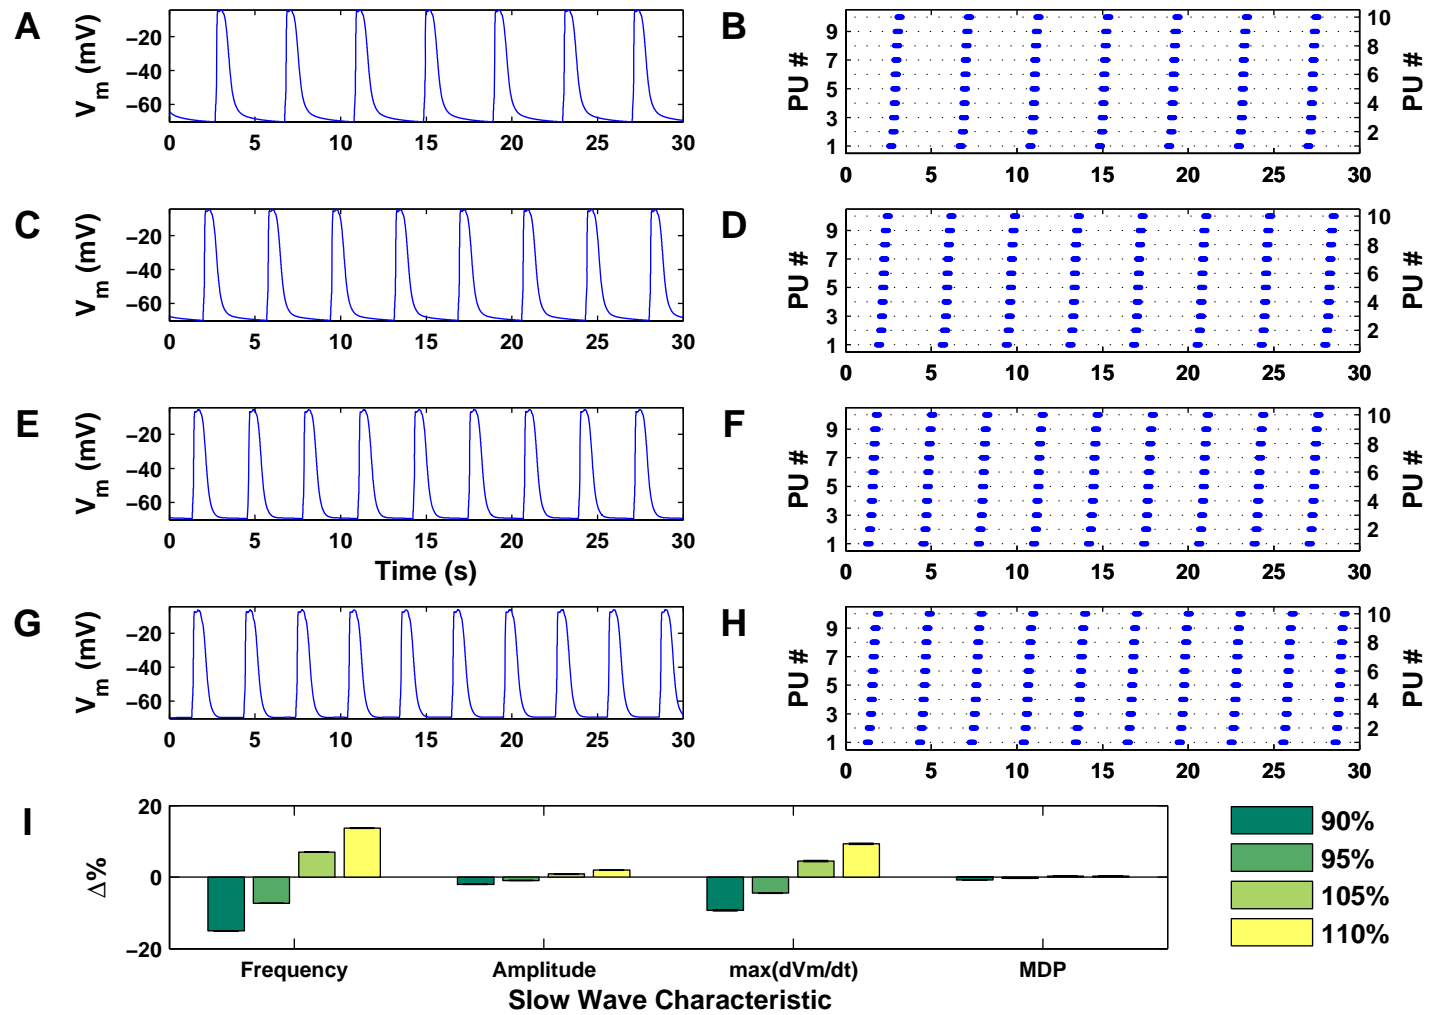

Figure S4 – Varying [IP<sub>3</sub>] Dose Response Simulations

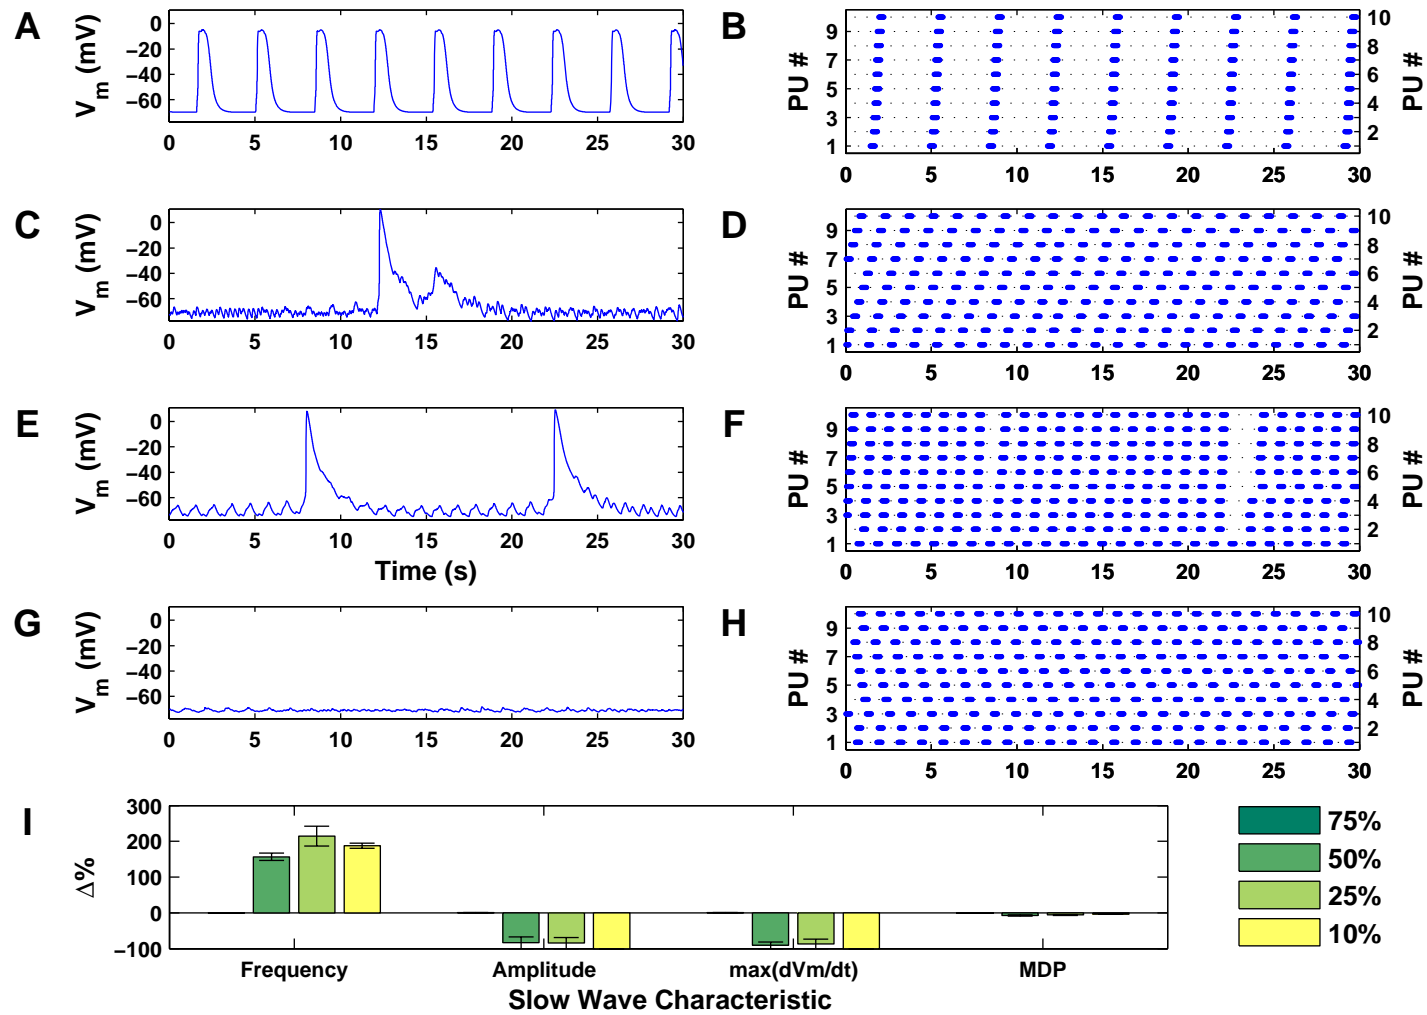

Figure S5 –  $J_{NCX}$  Inhibition Dose Response Simulations

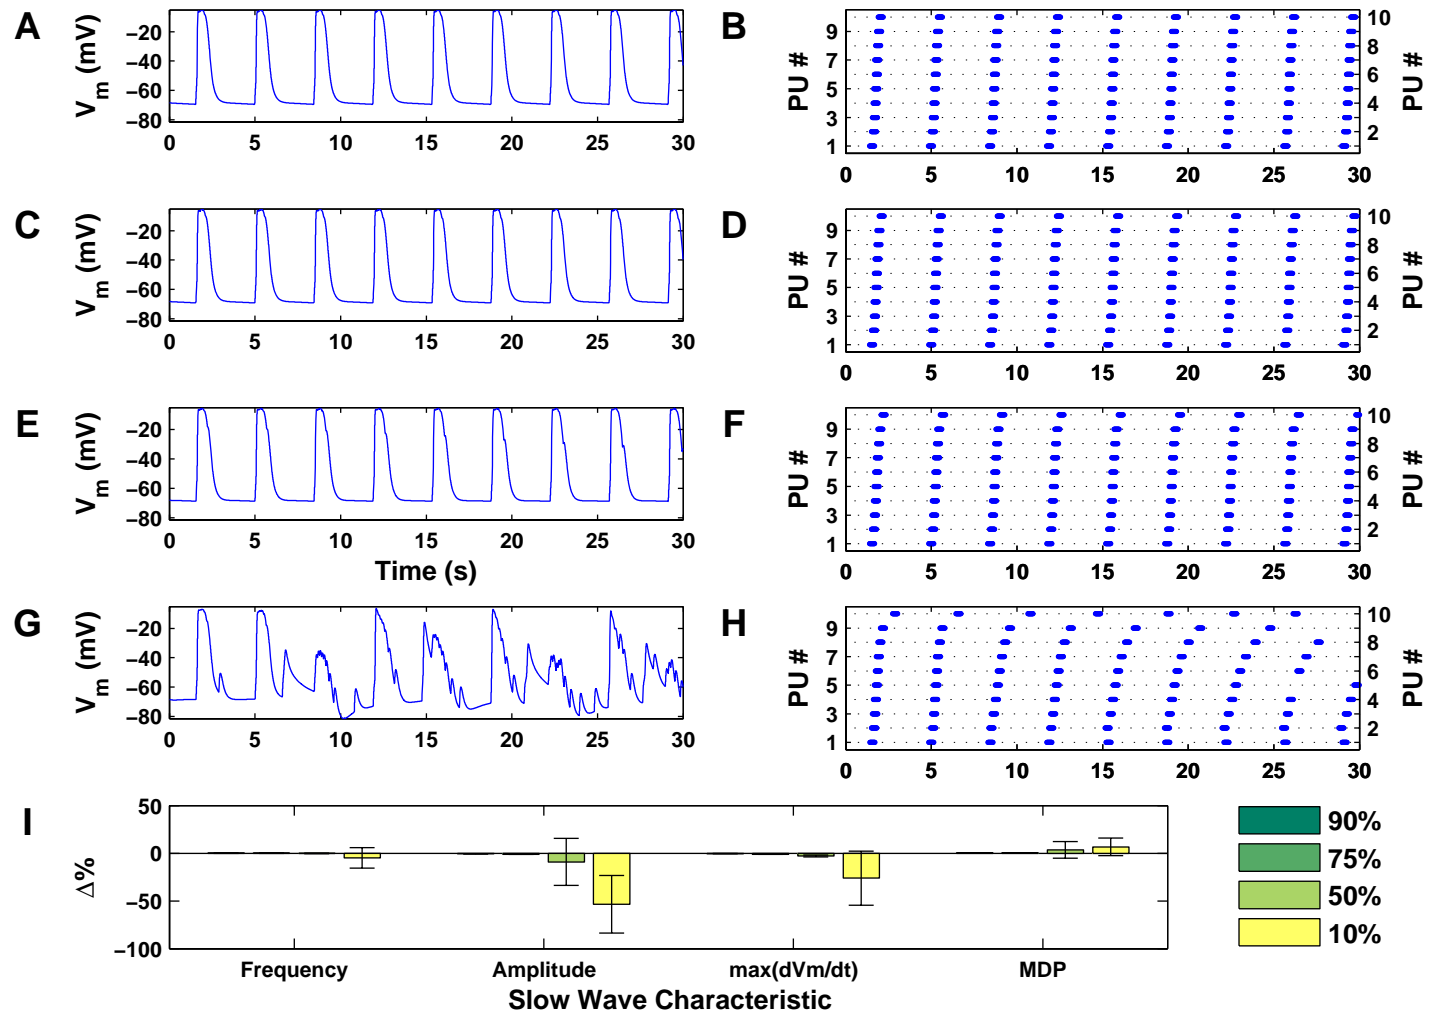

Figure S6 –  $I_{K(ERG)}$  Inhibition Dose Response Simulations

## PACEMAKER UNIT FIRING DISTRIBUTION

### Inverse Distribution Function

The cumulative distribution function,  $\psi(t)$  that describes pacemaker unit discharge over time is given by the 2-parameter Boltzmann function as follows:

$$\psi(t) = \frac{1}{1 + e^{-k_\psi(t-T_\psi)}} \quad (\text{S.A1})$$

Therefore, in order to determine the time at which a proportion,  $P_x$ , of the pacemaker unit population has fired, we invert  $\psi(t)$  as follows:

$$t = \psi^{-1}(P_x) = T_\psi - \frac{1}{k_\psi} \log_e \left( \frac{1}{P_x} - 1 \right) \quad (\text{S.A2})$$

### Pacemaker Unit Firing Probability

If a pacemaker unit population is comprised of  $n_{PU}$  units, then each pacemaker unit represents a proportion of  $1/n_{PU}$  of the entire population. Therefore, the proportion of the population which has fired after the discharge of  $i$  pacemaker units is given by the equation:

$$P_{x(i)} = \frac{i}{n_{PU}} \quad (\text{S.A3})$$

Note that as we are making a discrete approximation to a continuous distribution, this proportion is fixed as the midpoint of the interval over which it represents (i.e.,  $1/n_{PU}$ ).

$$\text{i.e. } P_{x(i)} = \frac{i}{n_{PU}} - \frac{1}{2n_{PU}} = \frac{2i-1}{2n_{PU}} \quad (\text{S.A4})$$

Substituting eqn. (S.A4) into eqn. (S.A2) therefore gives the time at which the  $i^{\text{th}}$  pacemaker unit will discharge:

$$t_i = T_\psi - \frac{1}{k_\psi} \log_e \left( \frac{2n_{PU}}{2i-1} - 1 \right) \quad (\text{S.A5})$$

### Pacemaker Cycle Landmark

As  $\psi(t)$  can be shifted in time to coincide with any arbitrary landmark point within the slow wave cycle, then the value of  $T_\psi$  is also arbitrary. Therefore,  $\psi(t)$  was fixed such that the firing of the first pacemaker unit was set at  $t = 0$ . This is due to the fact that this is

a landmark point which is common to any pacemaker unit population, independent of size. Substituting  $t = 0$  into eqn. (S.A5) and rearranging gives:

$$T_{\psi} = \frac{1}{k_{\psi}} \log_e \left( \frac{1}{P_{x(1)}} - 1 \right) \quad (\text{S.A6})$$

From eqn. (S.A4), we know that  $P_{x(1)} = 1/(2n_{PU})$ . Therefore, substituting eqn. (S.A4) into (S.A6) gives the following equation which describes  $T_{\psi}$  as a function of  $n_{PU}$ :

$$T_{\psi} = \frac{1}{k_{\psi}} \log_e (2n_{PU} - 1) \quad (\text{S.A7})$$

### **Pacemaker Unit Firing Time Distribution**

Substituting eqn. (S.A7) into eqn. (S.A5) gives the final equation describing the time at which the  $i^{\text{th}}$  pacemaker unit, from a population of  $n_{PU}$  units, will discharge as follows:

$$t_i = \frac{1}{k_{\psi}} \left[ \log_e (2n_{PU} - 1) - \log_e \left( \frac{2n_{PU}}{2i - 1} - 1 \right) \right] \quad (\text{S.A8})$$

## REFERENCES

1. Sneyd J., K. Tsaneva-Atanasova, J.I. Bruce, R.F. Straub, D.R. Giovannucci, and D.I. Yule. 2003. A model of calcium waves in pancreatic and parotid acinar cells. *Biophys J* 85:1392–1405.
2. De Weer, P., D.C. Gadsby, and R.F. Rakowski. 2001. Voltage dependence of the apparent affinity for external Na(+) of the backward-running sodium pump. *J Gen Physiol* 117: 315-28.
3. Koh, S.D., J.Y. Jun, T.W. Kim, and K.M. Sanders. 2002. A Ca(2+)-inhibited non-selective cation conductance contributes to pacemaker currents in mouse interstitial cell of Cajal. *J Physiol* 540: 803-814,.
4. Higgins, E.R., M.B. Cannell, and J. Sneyd. 2006. A buffering SERCA pump in models of calcium dynamics. *Biophys J* 91:151–163.
5. Gunter, T.E., and D.R. Pfeiffer. 1990. Mechanisms by which mitochondria transport calcium. *Am J Physiol* 258:C755–C786.
6. Colegrove, S.L., M.A. Albrecht, D.D. Friel. 2000. Quantitative analysis of mitochondrial Ca<sup>2+</sup> uptake and release pathways in sympathetic neurons. Reconstruction of the recovery after depolarization evoked [Ca<sup>2+</sup>]<sub>i</sub> elevations. *J Gen Physiol* 115:371–388.
7. Sneyd, J., A. LeBeau, and D.I. Yule. 2000. Traveling waves of calcium in pancreatic acinar cells: model construction and bifurcation analysis. *Physica D* 145:158–179.
8. Iftinca, M., B.E. McKay, T.P. Snutch, J.E. McRory, R.W. Turner, and G.W. Zamponi. 2006. Temperature dependence of T-type calcium channel gating. *Neuroscience* 142: 1031-1042.
9. Edwards, F.R., and G.D. Hirst. 2005. An electrical description of the generation of slow waves in the antrum of the guinea-pig. *J Physiol* 564: 213-32.
10. Corrias, A., and M.L. Buist. 2008. Quantitative cellular description of gastric slow wave activity. *Am J Physiol Gastrointest Liver Physiol* 294: G989-995.
